# Supplementary material for: Photostable wide-bandgap perovskites with enhanced interface coupling for all-perovskite tandems
Source: Royal Society of Chemistry journal article supplement (doi:10.1039/d5ee06683b), 2026-01-01
Supplement: d5ee06683b1.pdf [file d5ee06683b1.pdf]

## Electronic Supplementary Information

### Photostable wide-bandgap perovskites with enhanced interface coupling for all-perovskite tandems

Chunyan Li<sup>†ab</sup>, Yao Zhang<sup>†\*ab</sup>, Haiyan Zhao<sup>ab</sup>, Jixiang Zhang<sup>abc</sup>, Zhongxun Yu<sup>abc</sup>,  
Xiaoan Tang<sup>ab</sup>, Yudong Wang<sup>ab</sup>, Han Chen<sup>\*abd</sup>

#### Affiliations

<sup>a</sup> State Key Laboratory of Metal Matrix Composites, Shanghai Jiao Tong University, Shanghai, China.

<sup>b</sup> Innovation Center for Future Materials, Zhangjiang Institute for Advanced Study, Shanghai Jiao Tong University, Shanghai, China.

<sup>c</sup> Shanghai Jiao Tong University JA Technology New Energy Materials Joint Research Center, Shanghai, China.

<sup>d</sup> Joint Research Center for Clean Energy Materials, Shanghai Jiao Tong University, Shanghai, China.

<sup>†</sup>These authors contributed equally.

\*Correspondence: blinkdagger@sjtu.edu.cn; chen.han@sjtu.edu.cn

## Experimental Section

### Computational method

DFT simulations of the molecules were conducted using the ORCA 5.0.3 package<sup>1</sup>. Geometry optimizations were performed at the M06-2X<sup>2</sup>/Def2-TZVP<sup>3,4</sup> level of theory with D3zero<sup>5</sup> dispersion correction. The one-electron energies were obtained at the B3PW91<sup>6,7</sup>/Def2-TZVPP level of theory. DFT simulations of the periodic structures were conducted by CP2K<sup>8</sup> (version 2025.1). Geometry optimization was performed using the PBE<sup>9</sup> functional with DFT-D3<sup>5</sup> dispersion correction. The Brillouin zone was sampled at the gamma point, and the plane wave cutoff energy was 500 Ry. The Multiwfn<sup>10</sup> and VMD<sup>11</sup> codes were used for the ESP, integral overlap analysis, and visualization.

### Materials

Dimethylformamide (DMF, anhydrous 99.8%), dimethyl sulfoxide (DMSO, anhydrous 99.7%), isopropyl alcohol (IPA, anhydrous 99.5%), ethyl acetate (EA, anhydrous 99.5%), rubidium iodide (RbI, 99.9%), and SnF<sub>2</sub> (99%) were purchased from J&K Scientific. Lead bromide (PbBr<sub>2</sub>), lead iodide (PbI<sub>2</sub>), [4-(3,6-Dimethyl-9H-carbazol-9-yl)butyl]phosphonic acid (Me-4PACz), [2-(3,6-Dimethoxy-9H-carbazol-9-yl)ethyl]phosphonic acid (MeO-2PACz), [4-(7H-Dibenzo[c,g]carbazol-7-yl)butyl]phosphonic acid (4PADCB), ammonium thiocyanate (NH<sub>4</sub>SCN), p-phenylenediamine (PPD, >98%) and (4-Fluorophenyl)thiourea (FPT, >97%) were purchased from TCI Shanghai. Cesium iodide (CsI), propane-1,3-diammonium iodide (PDAI<sub>2</sub>), ethylenediamine diiodide (EDAI<sub>2</sub>), and C<sub>60</sub> were purchased from Xi'an Yuri Solar. Formamidineum iodide (FAI) and SnI<sub>2</sub> (99.99%) were obtained from Advanced Election Technology.

Bathocuproine (BCP) was obtained from Wako Chemical. PEDOT: PSS (Clevious P VP AI 4083) was obtained from Heraeus. Toluene was obtained from Sinopharm. Tetrakis(dimethylamino)tin(IV) (TDMASn, 99.9999%) was obtained from Suzhou Yuanzhan. All materials were used as received.

### **Perovskite precursors**

*Wide-bandgap perovskite  $\text{Cs}_{0.2}\text{FA}_{0.8}\text{Pb}(\text{I}_{0.61}\text{Br}_{0.37})_3$* : The 1.2 M precursor was prepared by mixing CsI (0.24 mmol), FAI (0.96 mmol),  $\text{PbBr}_2$  (0.67 mmol),  $\text{PbI}_2$  (0.53 mmol), and  $\text{Pb}(\text{SCN})_2$  (2 mg) in 800  $\mu\text{L}$  of DMF and 200  $\mu\text{L}$  of DMSO. The precursors were dissolved at 50 °C for 2-3 h and filtered through a 0.22- $\mu\text{m}$  PTFE filter before use.

*Narrow-bandgap perovskite  $\text{Rb}_{0.04}\text{Cs}_{0.2}\text{FA}_{0.76}\text{Pb}_{0.5}\text{Sn}_{0.5}\text{I}_3$* : The 2 M precursor was prepared by mixing RbI (0.08 mmol), CsI (0.4 mmol), FAI (1.52 mmol),  $\text{PbI}_2$  (1 mmol),  $\text{SnI}_2$  (1 mmol),  $\text{SnF}_2$  (0.11 mmol),  $\text{NH}_4\text{SCN}$  (0.045 mmol), PEACl (0.008 mmol) and PPD (0.07 mmol) into 700  $\mu\text{L}$  of DMF and 300  $\mu\text{L}$  of DMSO. The precursors were dissolved at room temperature and filtered through a 0.22- $\mu\text{m}$  PTFE filter before use.

### **Fabrication of Single-junction WBG PSCs**

Patterned FTO substrates (AGC, 2.2 mm, 6-8  $\Omega/\square$ ) were sequentially cleaned using detergent, deionized water, acetone, and IPA under ultrasonication for 15 mins. After being dried by nitrogen flow, the substrates were treated with ultraviolet ozone for 15 min. NiO layer was deposited on the FTO substrate by spray pyrolysis. Nickel acetylacetonate (2 mmol) was dissolved in acetonitrile (38 ml) and ethanol (2 ml). The solution was sprayed by an air nozzle using clean dry air as carrier gas onto the FTO substrates, which were previously heated to 400 °C on a hot plate. The substrates were kept at 400 °C for 20 min and then cooled down to room temperature before moving

into glovebox. Me-4PACz (0.5 mg/ml in IPA) was spin-coated at 3000 rpm for 25 s, followed by annealing at 100 °C for 10 min. After cooling down, FPT (0.5 mg/ml in IPA) was spin-coated at 3000 rpm for 25 s, followed by annealing at 100 °C for 5 min. The perovskite precursor was spin-coated with a two-step procedure. The first step was at 2000 rpm for 10 s with an acceleration of 200 rpm s<sup>-1</sup>; the second step was at 4000 rpm for 40 s with an acceleration of 1000 rpm s<sup>-1</sup>. Ethyl acetate (300 µL) was dropped 20 s before the end of the spin, followed by annealing at 100 °C for 15 min. After cooling, PDAI<sub>2</sub> (1 mg/mL in IPA) was dropped onto the perovskite films and spin-coated at 4000 rpm for 25 s, followed by annealing at 100 °C for 5 min. Then, 20 nm C<sub>60</sub> was deposited at the rate of 0.2 Å/s in a vacuum chamber (< 3×10<sup>-4</sup> Pa). Then the samples were transferred to the atomic layer deposition system (T-ALD, KE-MICRO). A SnO<sub>2</sub> layer (~15 nm) was deposited at 85 °C by 130 cycles of the following: 0.35 s TDMASn pulse, 8 s purge, 0.1 s deionized water pulse, and 8 s purge. Finally, Cu (100 nm) was thermally evaporated in a vacuum chamber (< 3×10<sup>-4</sup> Pa).

### **Fabrication of all-perovskite tandem solar cells**

The WBG sub-cells were fabricated following the procedure described above. After ALD-SnO<sub>2</sub> deposition, an IZO recombination layer (~120 nm) was deposited at room temperature by radio-frequency magnetron sputtering (70 W) using a 4-inch IZO target in pure argon (0.3 Pa). PEDOT: PSS diluted with IPA (1:2 volume ratio) was spin-coated onto the as-prepared IZO layer at 4000 rpm for 30 s, followed by annealing at 120 °C for 10 min in air, and then moved into a N<sub>2</sub>-filled glovebox. The Sn-Pb perovskite films were deposited with a two-step spin-coating procedure: 1000 rpm for 10 s with an acceleration of 200 rpm s<sup>-1</sup>; and 4000 rpm for 40 s with an acceleration of 1000 rpm s<sup>-1</sup>. Ethyl acetate (400 µL) was dropped on the substrate at 20 s before the end

of the procedure. Then 0.5 mg/ml EDAI<sub>2</sub> solution in mixed IPA/toluene (2:1 volume ratio) was applied onto the cooled perovskite films and spin-coated at 4000 rpm for 25 s, followed by annealing at 100 °C for 5 min. Then the substrates were transferred to the evaporation system, and C<sub>60</sub> (15 nm), BCP (8 nm), and Cu (100 nm) were deposited sequentially in a vacuum chamber ( $< 3 \times 10^{-4}$  Pa).

### **Film Characterizations**

GIWAXS measurements were performed at the BL20U2 beamline in Shanghai Synchrotron Radiation Facility using 10 KeV X-rays. The grazing-incidence angle was 1° and the exposure time was 20 s. The X-ray diffraction (XRD) was conducted using an X-ray diffractometer (ARL Equinox 3500) with Cu K $\alpha$  radiation at a scan speed of 2°/min. Fourier transform infrared spectroscopy was performed on a Nicolet 6700 spectrophotometer. The SEM images of perovskite films and devices were collected using a Gemini 300 instrument. KPFM measurements were conducted on the FastScan Bio (Bruker). X-ray photoelectron spectroscopy measurements were performed on an ESCALAB Xi+ spectrometer using an Al K $\alpha$  X-ray source. Ultraviolet photoelectron spectroscopy (UPS) spectra were measured with a He I $\alpha$  photon source. The binding energy scale was calibrated using a clean gold film. Photoluminescence (PL) spectra and time-resolved PL spectra were recorded by a steady-state transient fluorescence spectrometer (FLS1000). PL peak energy mappings were probed using a Raman image-scanning electron microscope (RISE-MAGNA). Absorption spectra were recorded using a UV-vis-NIR spectrometer (PerkinElmer Lambda 750S). Femtosecond transient absorption spectroscopy was conducted on Femto/Nano-TA100 (TIME-TECH SPECTRA). Contact angle measurements were carried out on a DSA100 instrument.

## Device Characterizations

The current density-voltage ( $J$ - $V$ ) characteristics of the perovskite solar cells were measured with a Keithley 2400 source meter under simulated AM1.5G one-sun illumination provided by a dual light source simulator (WXS-90S-L2, Wacom), calibrated by a Si-reference cell (91150-KG5). For the single-junction perovskite solar cells, the  $J$ - $V$  curves were acquired via reverse scan (1.35 V to -0.1 V) and forward scan (0.1 V to 1.35 V), with a voltage step of 10 mV and a delay time of 10 ms. For the all-perovskite tandem solar cells,  $J$ - $V$  curves were obtained using reverse scan (2.2 V to -0.1 V) and forward scan (-0.1 V to 2.2 V), with the voltage step of 10 mV and delay time of 10 ms. The active area of the devices was defined by a black metal mask. The transient photocurrent measurements were conducted on a characterization platform for solar cells (PAIOS, Fluxim). External quantum efficiency was obtained using monochromatic incident light of  $1 \times 10^{16}$  photons  $\text{cm}^{-2}$  in direct current mode (CEP-2000BX, Bunko-Keiki). Space charge limited current, dark  $J$ - $V$  curves, and Mott-Schottky curves were collected on an electrochemical analysis instrument (Zahner, Germany).

For the thermal stability measurement, the unencapsulated devices were placed on a heating plate at 85 °C in the N<sub>2</sub>-filled glovebox (H<sub>2</sub>O, <0.01 ppm; O<sub>2</sub>, <0.01 ppm). All the devices are cooled down before each measurement. Device encapsulation was conducted using glass-to-glass sealing with a caved glass cover and epoxy encapsulant (Three Bond). For maximum power point tracking, the encapsulated device was operated in ambient air (30-40% RH, 20-30 °C) under simulated one-sun illumination (Xenon lamp). No UV filter was applied during operation

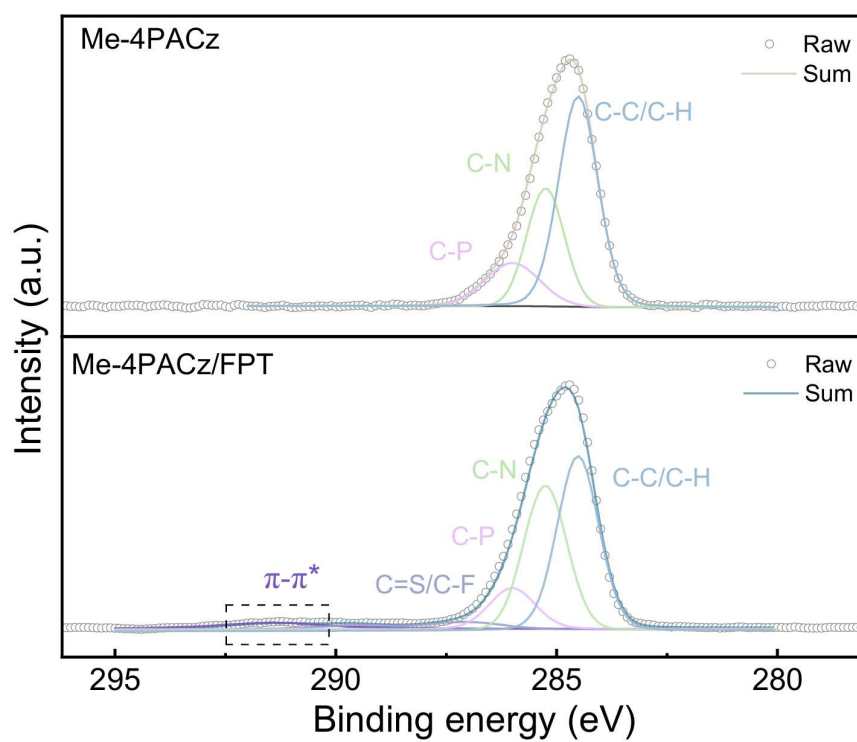

Figure S1. XPS C 1s core-level spectra of Me-4PACz and Me-4PACz/FPT hybrid.

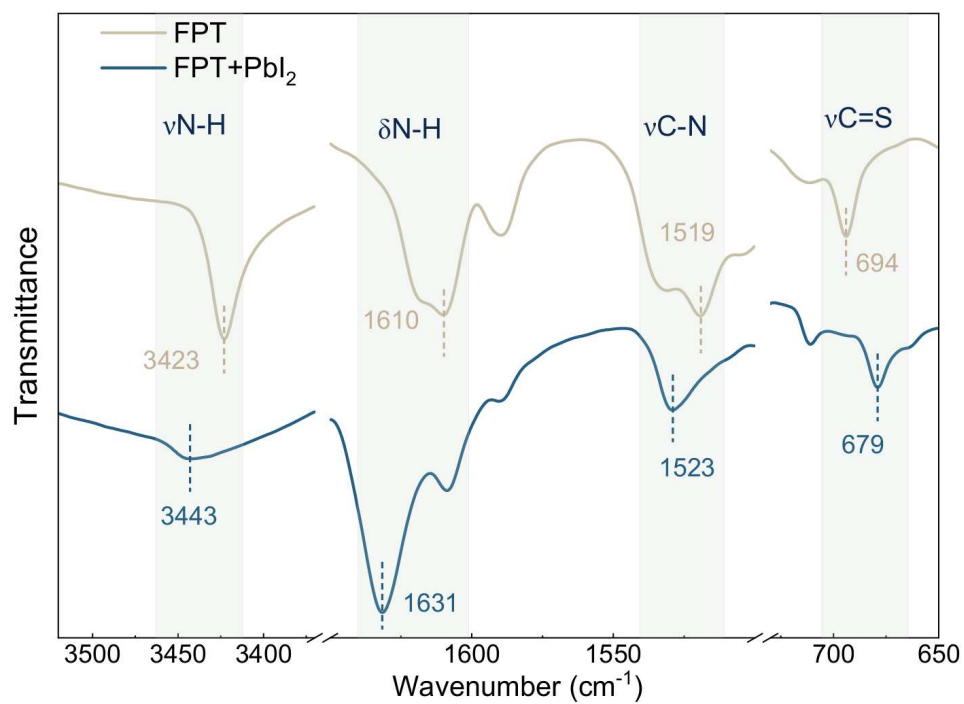

Figure S2. FTIR spectra of FPT and FPT+PbI<sub>2</sub> mixture.



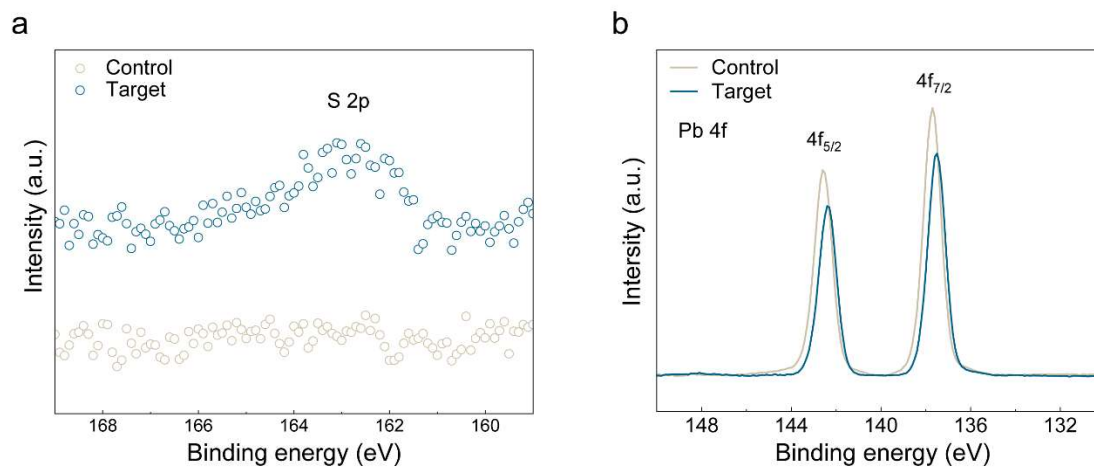

Figure S3. XPS spectra collected on the buried surface of the perovskite films deposited on Me-4PACz (control) and Me-4PACz/FPT (target) substrates. (a) S 2p core-level; (b) Pb 4f core-level.

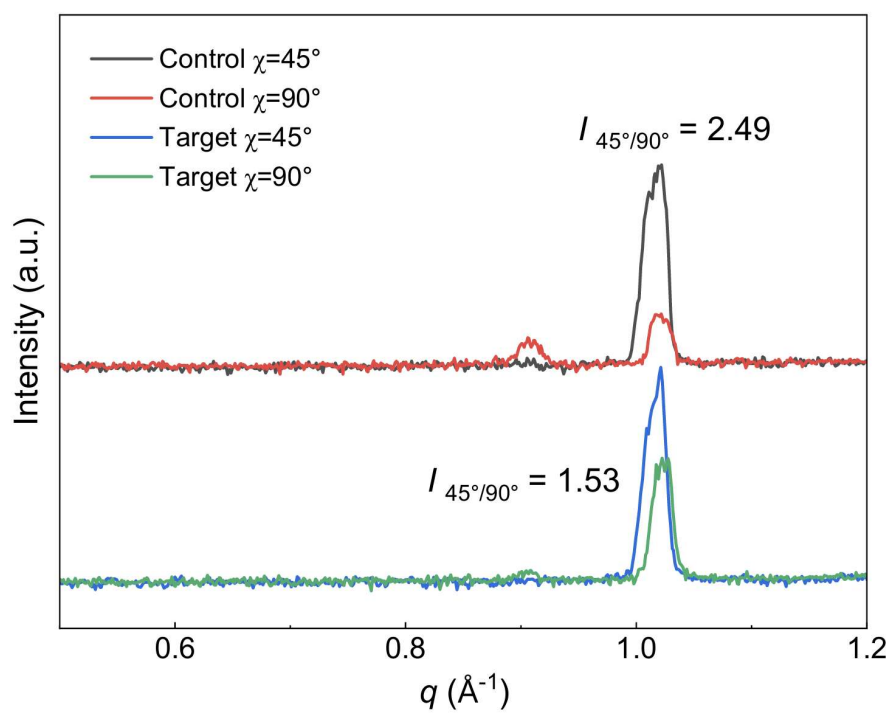

Figure S4. Linecut intensity profiles of the GIWAXS patterns at  $45^\circ$  and  $90^\circ$  azimuthal angles.

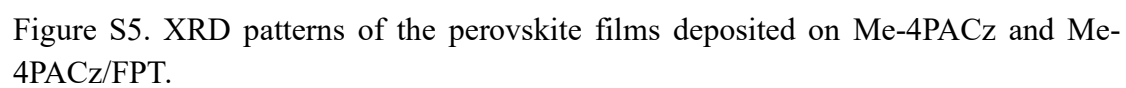

Figure S5. XRD patterns of the perovskite films deposited on Me-4PACz and Me-4PACz/FPT.

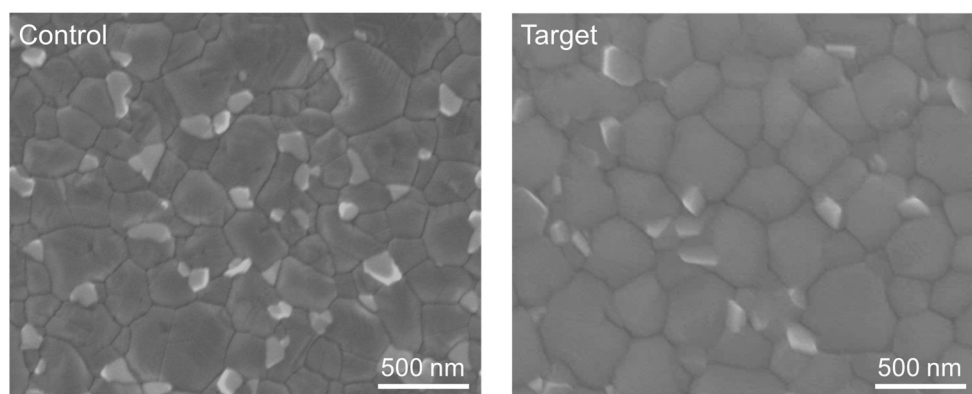

Figure S6. SEM images of top surface of the perovskite films.

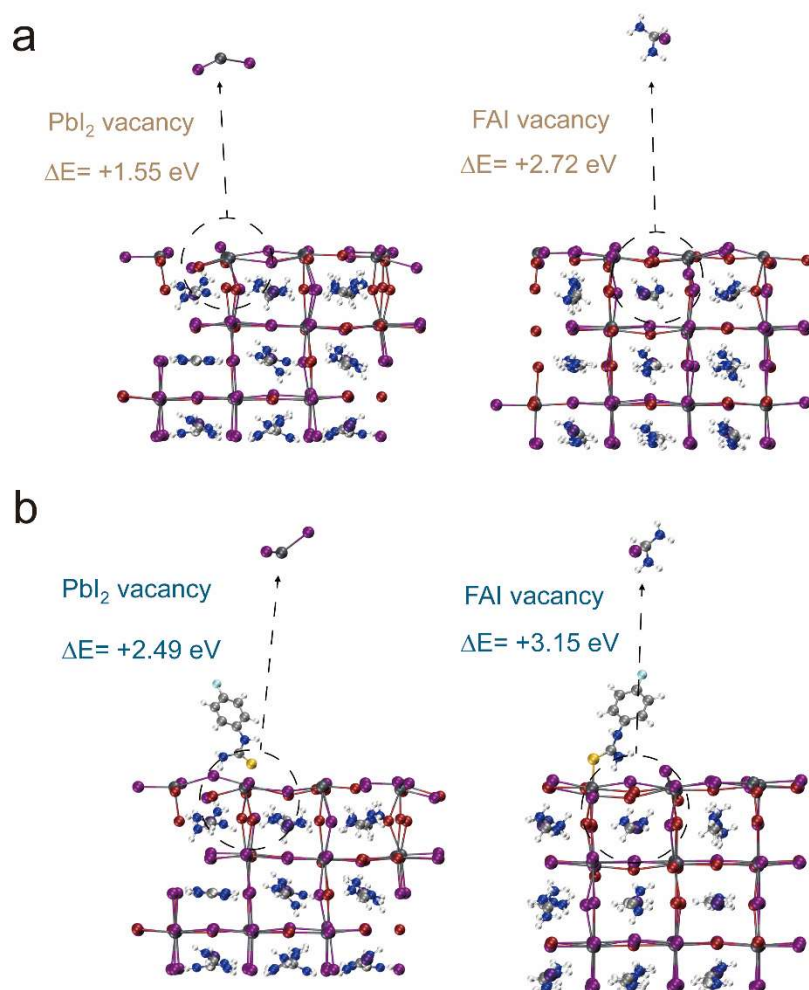

Figure S7. Formation energy of the neutral PbI<sub>2</sub> and FAI vacancies on the Pb-I/Br-terminated grain surface (a) without and (b) with FPT.

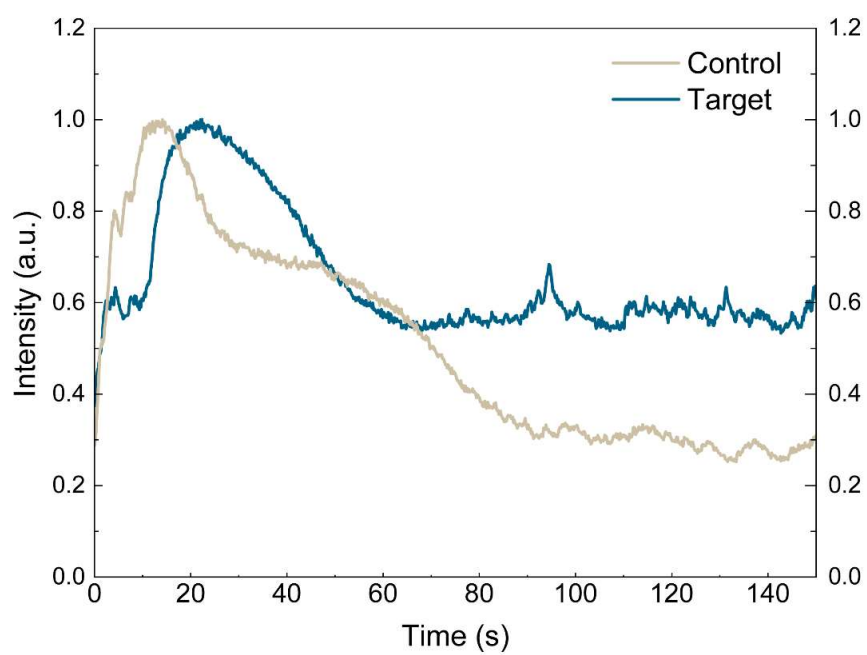

Figure S8. Evolution of emission intensity (probed at 709 nm) of the perovskite films during annealing, normalized at their maxima.

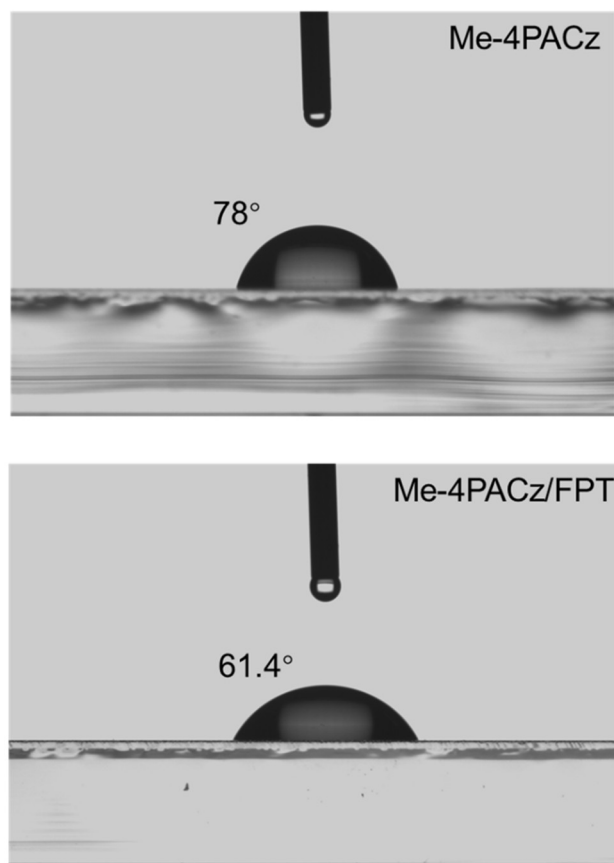

Figure S9. Contact angle images of perovskite precursor on Me-4PACz and Me-4PACz/FPT substrates.

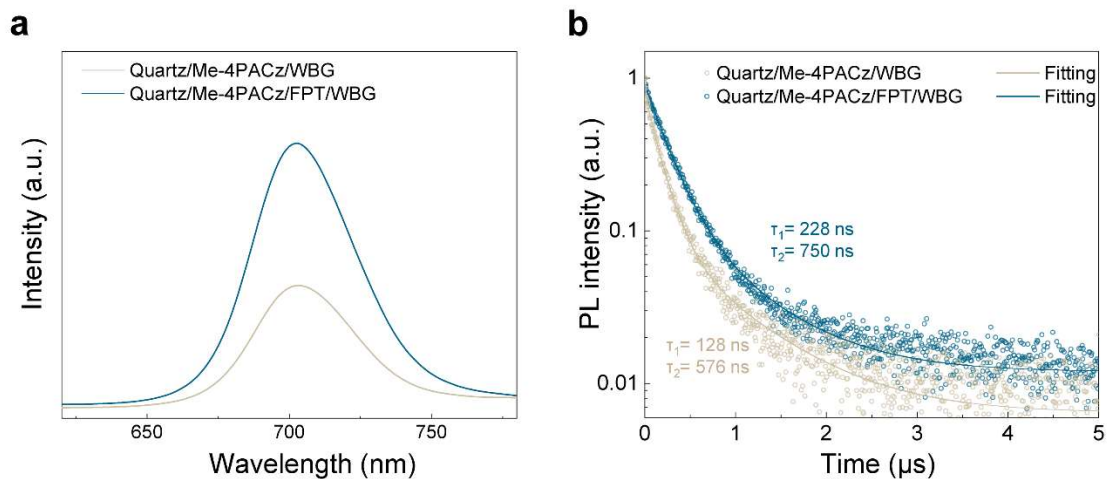

Figure S10. (a) PL spectra and (b) time-resolved PL decay of the perovskite films deposited on quartz/Me-4PACz and quartz/Me-4PACz/FPT. The TRPL fitting details are shown in Table S1.



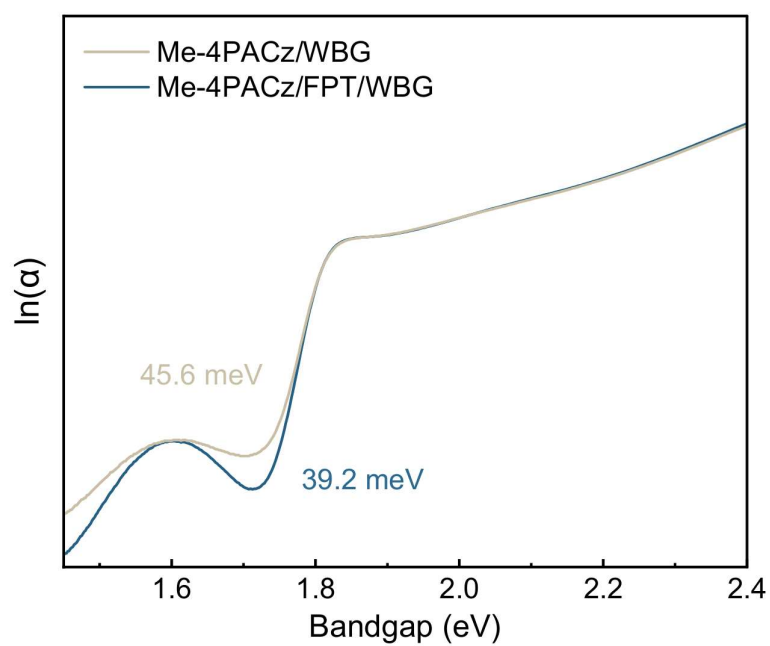

Figure S11. Urbach energies of the perovskite films deposited on quartz/Me-4PACz and quartz/Me-4PACz/FPT, derived from the absorption curves.

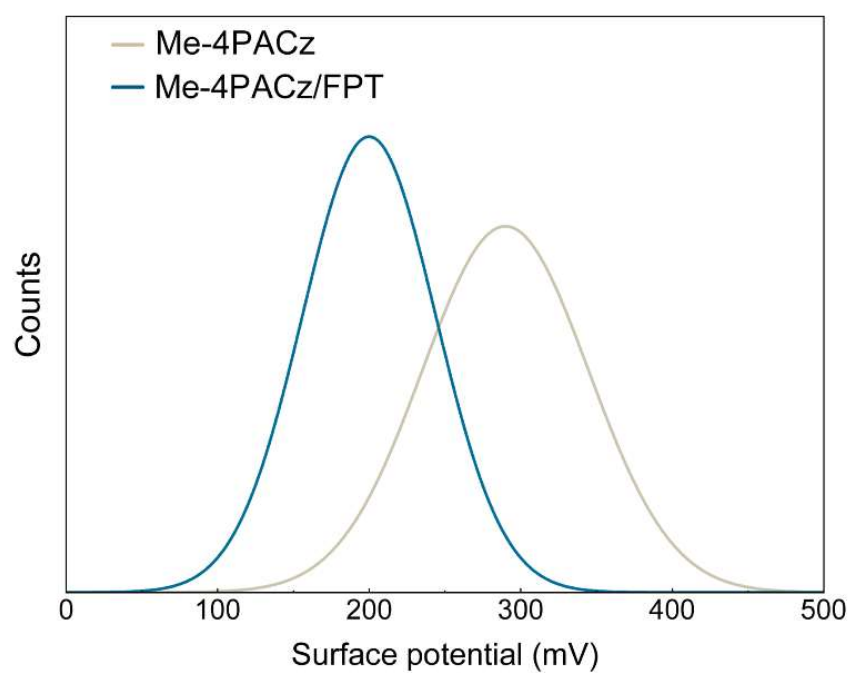

Figure S12. Statistical distribution of the surface potential values of Me-4PACz and Me-4PACz/FPT hybrid.

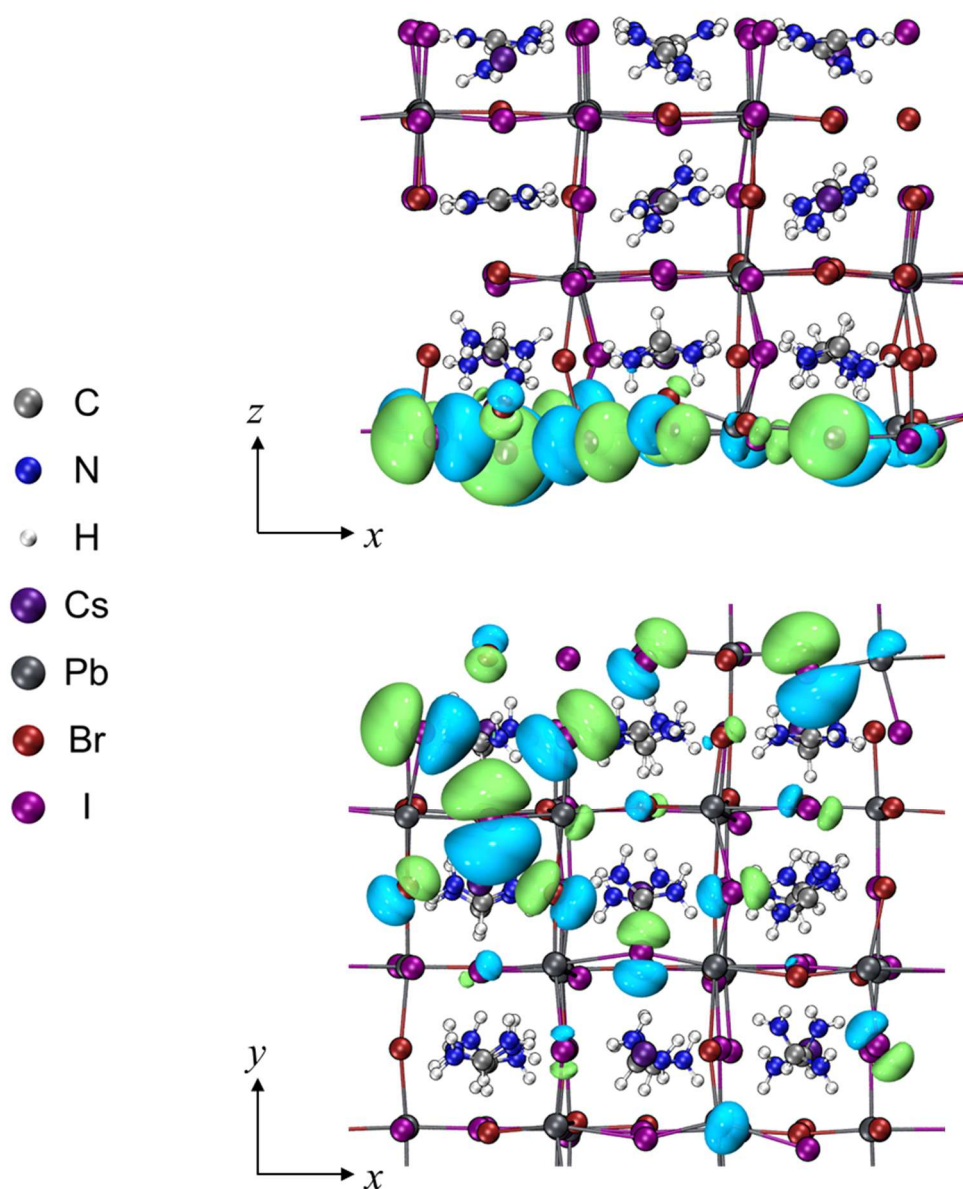

Figure S13. Wavefunction iso-surfaces of the VBM orbital of WBG perovskite. Green, positive value; blue, negative value.

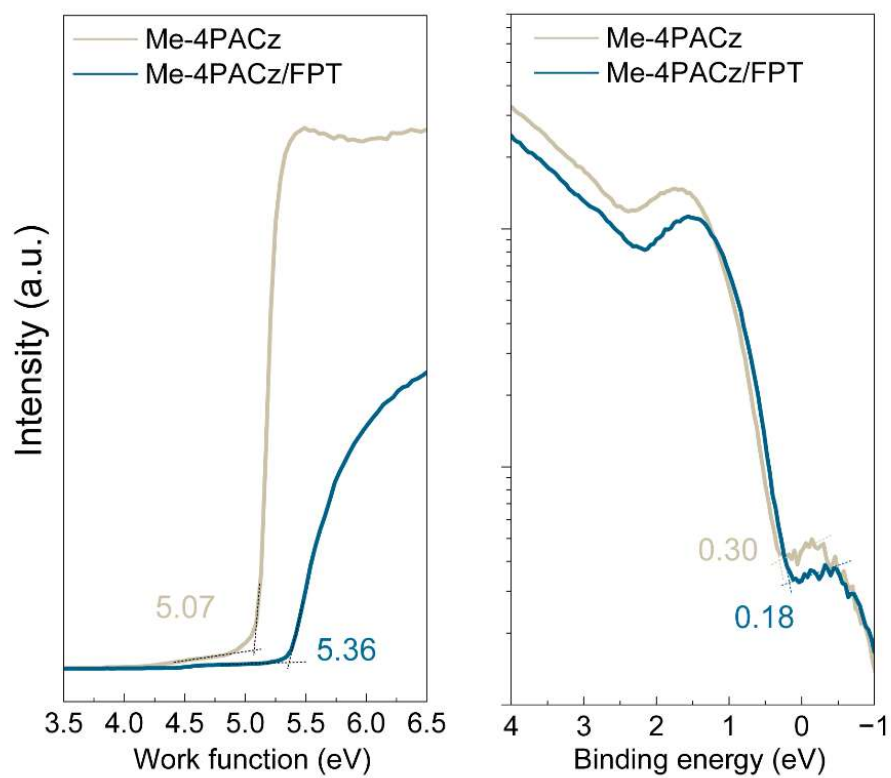

Figure S14. UPS spectra of Me-4PACz and Me-4PACz/FPT hybrid.

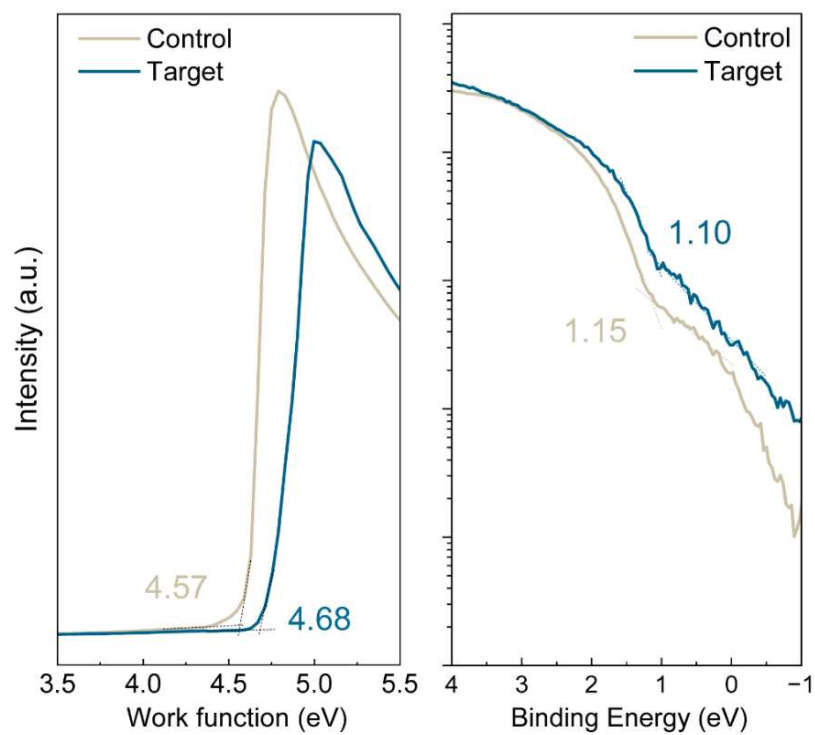

Figure S15. UPS spectra collected on the buried surface of the perovskite films deposited on Me-4PACz (control) and Me-4PACz/FPT (target).

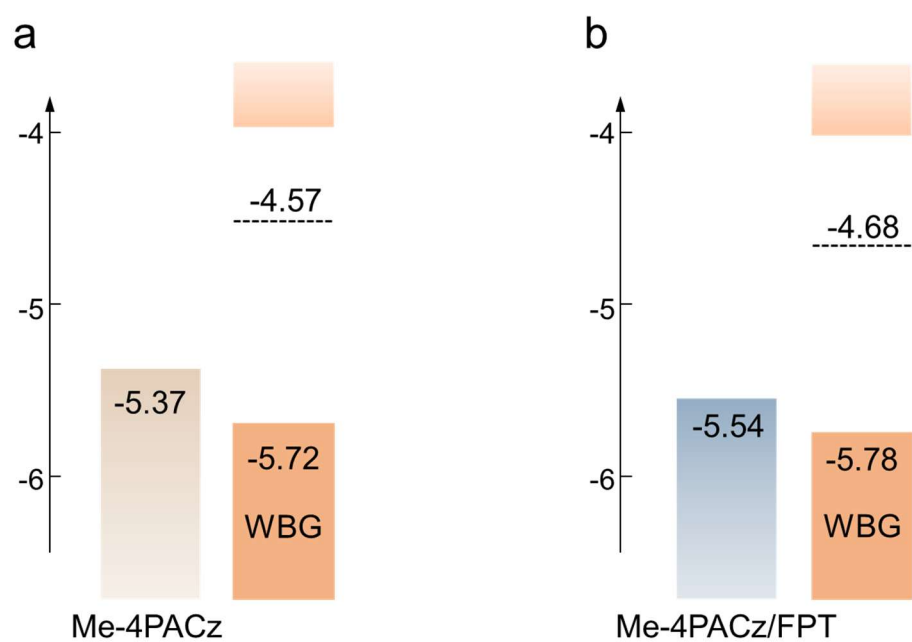

Figure S16. Energy level alignment at the hole collecting heterointerface of (a) control and (b) target devices.

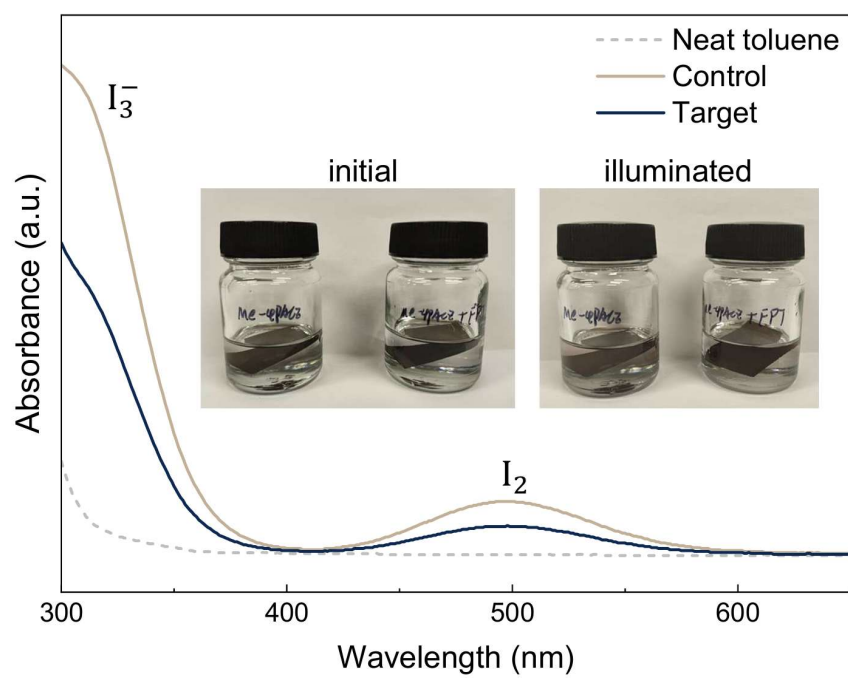

Figure S17. Absorption curves of the toluene solutions containing the perovskite films. Inset, photos of the toluene solution before and after illumination.

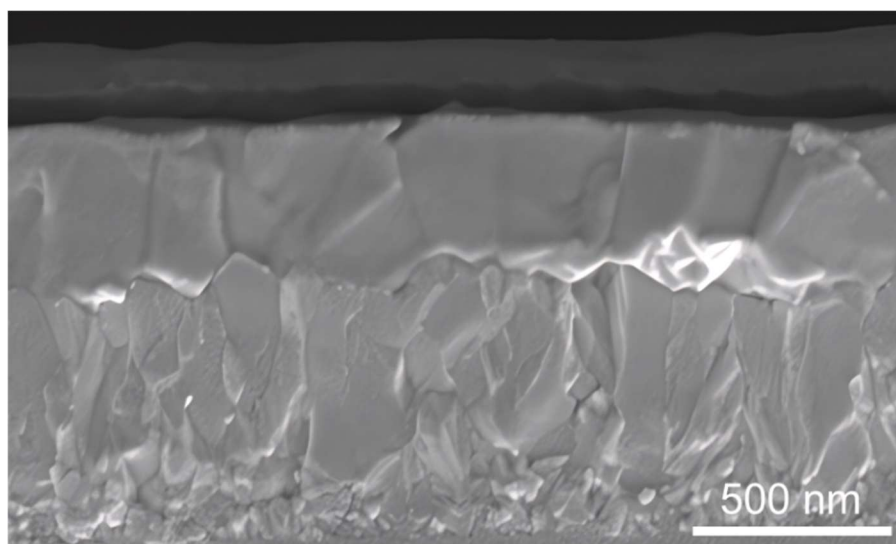

Figure S18. Cross-sectional SEM image of a single-junction WBG PSC.



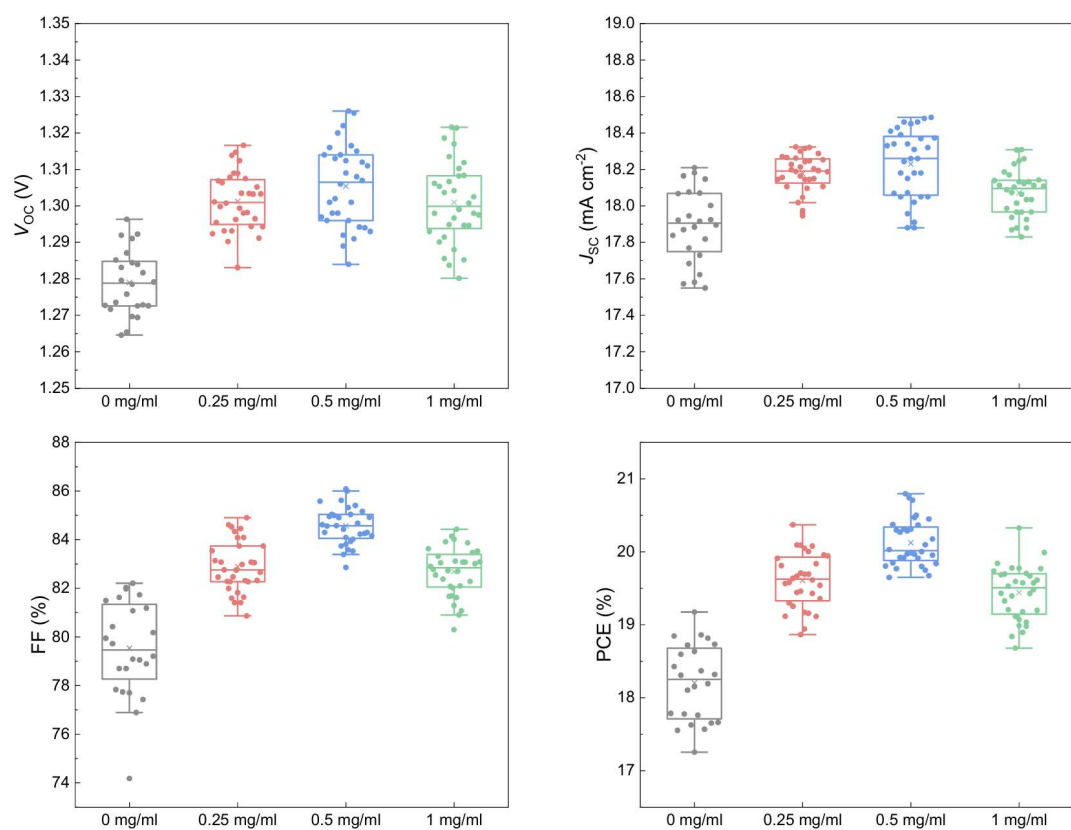

Figure S19. Photovoltaic parameters statistics of the single-junction WBG PSCs with different FPT concentrations, measured by reverse scan. Center line, median; cross mark, mean; box range, 25/75 percentiles; whiskers, the outermost outliers within 1.5 × interquartile range.

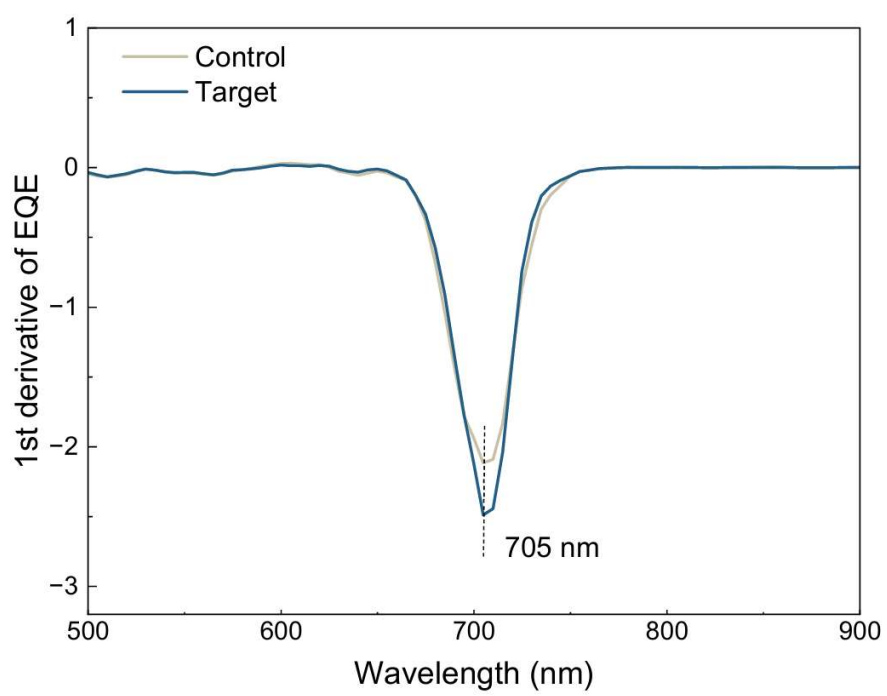

Figure S20. The first derivatives of the EQE curves.

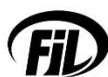

福建省计量科学研究院  
FUJIAN METROLOGY INSTITUTE  
(国家光伏产业计量测试中心)  
National PV Industry Measurement and Testing Center

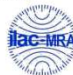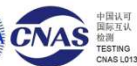

# 检测报告

## Test Report

报告编号: 25Q3-00100

Report No.

客户信息

Name of Customer

上海交通大学/Shanghai Jiao Tong University

联络信息

Contact Information

上海市闵行区东川路800号/800 Dongchuan Road, Minhang District,  
Shanghai, China

物品名称

Name of Items

钙钛矿太阳能电池/perovskite solar cell (IV)

型号/规格

Type/Specification

25mm × 25mm

物品编号

Items No.

L2-2

制造厂商

Manufacturer

上海交通大学/Shanghai Jiao Tong University

物品接收日期

Items Receipt Date

2025-01-13

检测日期

Test Date

2025-01-20

批准人:

Approved by

黎健生

黎健生

(盖章处)

Stamp

核验员:

Checked by

何翔

何翔

检测员:

Test by

陈彩云

陈彩云

发布日期:

Date of Report

2025 年 01 月 20 日

Year

Month

Day

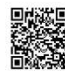

扫一扫 查真伪

本院/本中心地址: 福州市屏东路9-3号  
Address: 9-3 Pingdong Road, Fuzhou, China

网址: www.fjil.net  
Web Site

电话: 0591-87845050  
Telephone

咨询电话: 0591-87845050  
Inquire line

传真: 0591-87808417  
Fax

投诉电话: 0591-87823025  
Complaint Tel

邮编: 350003  
Post Code

未经本院/本中心书面批准, 部分采用本报告内容无效。  
Partly using this Report will not be admitted unless allowed by FMI/ Center.

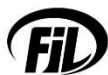

福建省计量科学研究院  
FUJIAN METROLOGY INSTITUTE  
(国家光伏产业计量测试中心)  
National PV Industry Measurement and Testing Center

报告编号: 25Q3-00100

Report No.

1. 检测机构说明:

Testing institutions that

本院为国家法定计量检定机构, 国家光伏产业计量测试中心依托本院检测技术开展检测。本院/本中心质量管理体系符合GB/T 27025 (ISO/IEC 17025, IDT) 标准要求。

The Institute is a national legal metrological institution. National PV Industry Measurement and Testing Center carries out testing relying on the institute's testing technology. The Center's quality management system meets the requirements of GB/T 27025 (ISO/IEC 17025, IDT) standard.

2. 本次检测所依据的检测方法(代号及名称):

Reference documents for the test (code,name)

SJ/T 11630—2016 太阳能电池用硅片几何尺寸测试方法; IEC 60904-1-2020 光伏器件-第一部分: 光伏电流-电压特性的测量

3. 本次检测所使用的主要测量仪器:

Measurement standards used in this test

| 仪器名称<br>Name | 仪器编号<br>Number | 测量范围<br>Measuring Range                    | 不确定度/或准确度等级/或最大允许误差<br>Uncertainty or Accuracy Class or Maximum Permissible Error                                                | 溯源机构名称/证书编号<br>Name of traceability institution/Certificate No. | 有效期限<br>Due date |
|--------------|----------------|--------------------------------------------|----------------------------------------------------------------------------------------------------------------------------------|-----------------------------------------------------------------|------------------|
| WPVS单晶硅标准电池  | 015-2014       | (300~1200) nm                              | $U_{rel}=1.3\% (k=2)$                                                                                                            | 中国计量院<br>GXgf2023-01245                                         | 2025-03-29       |
| 源表           | 10807C00878-2  | 电流: 10 $\mu$ A~1A; 电压: 20mV~20V            | 测量: DCV: $U_{rel}=0.05\%, k=2$ ; DCT: $U_{rel}=0.05\%, k=2$<br>输出: DCV: $U_{rel}=0.05\%, k=2$ ; DCT: $U_{rel}=0.05\%, k=2$       | 福建计量院24D2-01917                                                 | 2025-04-17       |
| 太阳模拟器        | 2014-017       | (300~1200) nm; (300~1200) W/m <sup>2</sup> | 光谱匹配度(300~360) nm: $U_{rel}=8.0\% (k=2)$ ; (360~1200) nm: $U_{rel}=6.2\% (k=2)$ ; 辐照度比(辐照度不均匀度、辐照度时间不稳定性): $U_{rel}=1.2\% (k=2)$ | 福建计量院24Q2-00981                                                 | 2025-06-16       |
| 数字温度计        | 15-B           | (15~65) $^{\circ}$ C                       | $U=0.1^{\circ}$ C ( $k=2$ )                                                                                                      | 福建计量院24B2-05374                                                 | 2025-06-19       |
| 自动影像测量仪      | 11656          | X轴: (0~195) mm; Y轴: (0~195) mm             | $U=2 \mu$ m ( $k=2$ )                                                                                                            | 福建计量院24A2-09430                                                 | 2025-07-23       |
| /            | /              | /                                          | /                                                                                                                                | /                                                               | /                |

4. 检测地点及环境条件

Location and environmental condition for the test

地点: 本院闽侯科研基地4号楼108室/Room 108, Building 4, MinHou Scientific Research Base

Location

温度: 24.7  $^{\circ}$ C 相对湿度: 38 % 其它: /

Temperature

Relative Humidity

Others

5. 备注: /

Note

本报告提供的结果仅对本次被检的物品有效。

The data are valid only for the instrument(s) under testing.

检测报告续页专用

Continued page of test report

检测结果/说明:  
Results of Test and additional explanation:

1. 标准测试条件 Standard Test Condition (STC):  
总辐照度 Total Irradiance: 1000 W/m<sup>2</sup>  
被测电池温度 Temperature: 25.0 °C  
光谱分布 Spectral Distribution: AM1.5G
2. STC条件下测量数据 Measurement Data and I-V/P-V Curves under STC

正扫 Forward Scan

| $I_{sc}$ (mA) | $V_{oc}$ (V) | $I_{MPP}$ (mA) | $V_{MPP}$ (V) | $P_{MPP}$ (mW) | $FF$ (%) | $A$ (cm <sup>2</sup> ) |
|---------------|--------------|----------------|---------------|----------------|----------|------------------------|
| 1.766         | 1.301        | 1.648          | 1.147         | 1.890          | 82.26    | 0.0948                 |

反扫 Reverse Scan

| $I_{sc}$ (mA) | $V_{oc}$ (V) | $I_{MPP}$ (mA) | $V_{MPP}$ (V) | $P_{MPP}$ (mW) | $FF$ (%) | $A$ (cm <sup>2</sup> ) |
|---------------|--------------|----------------|---------------|----------------|----------|------------------------|
| 1.767         | 1.305        | 1.682          | 1.147         | 1.929          | 83.65    | 0.0948                 |

失配因子 Mismatch factor: 1.004

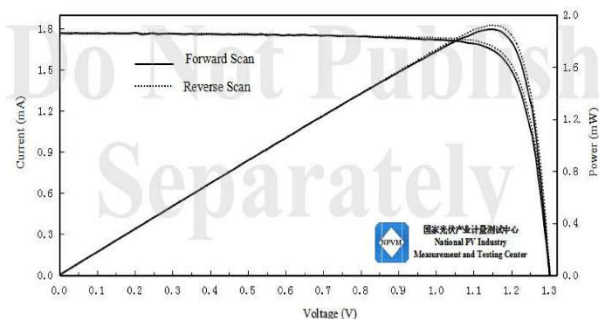

图1 STC下电流-电压特性曲线和功率-电压特性曲线  
Figure 1. I-V and P-V characteristic curves of the measured sample under STC

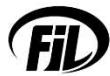

检测结果/说明:

Results of Test and additional explanation.

3.STC条件下最大功率稳态输出的测量数据及曲线Measurement Data and Curves for MPPT under STC

|                |       |
|----------------|-------|
| $\eta$ (%)     | 19.57 |
| $P_{MPP}$ (mW) | 1.855 |
| $I_{MPP}$ (mA) | 1.624 |
| $V_{MPP}$ (V)  | 1.142 |

说明: 上表为 300秒测试过程中最后 30 秒内 STC 条件下的最大功率稳态输出平均测试数据  
Note: Measurement data for MPPT under STC in the above table was the mean value acquired during the final 30 seconds of the 300 seconds test

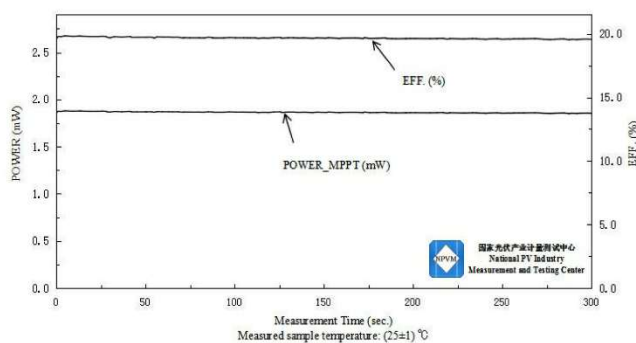

图2 被测样品最大功率稳态输出的功率-效率曲线  
Figure 2. Measurement curves of the measured sample for MPPT

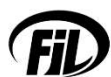

检测结果/说明:  
Results of Test and additional explanation.

#### 4. Pictures of the Measured Sample

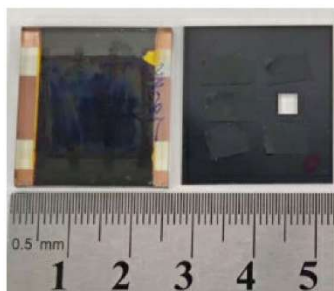

图3 被测样品的正面图像及测试中使用的掩膜板  
Figure 3. Mask used during test and obverse side of the measured sample

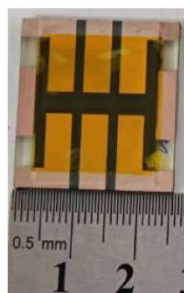

图4 被测样品的反面图像  
Figure 4. Reverse side of the measured sample

测量结果的不确定度为/Uncertainty of measurement results:

短路电流/Short-Circuit Current:  $U_{rel}=1.8\%$  ( $k=2$ ); 开路电压/Open-Circuit Voltage:  $U_{rel}=1.0\%$  ( $k$

最大功率/Maximum Power:  $U_{rel}=2.2\%$  ( $k=2$ ); 转换效率/Efficiency:  $U_{rel}=2.2\%$  ( $k=2$ );

填充因子/Fill Factor:  $U_{rel}=3.2\%$  ( $k=2$ ).

说明: 该报告中的面积为限定辐照面积。

Explanation: The measured area refers to designated illuminated area.

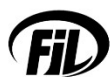

检测结果/说明:  
Results of Test and additional explanation.

| Testing Method (Code and Name) for This Test                                                                |
|-------------------------------------------------------------------------------------------------------------|
| IEC 60904-1: 2020 Photovoltaic devices- Part 1: Measurement of photovoltaic current-voltage characteristics |
| SJ/T 11630-2016: Test method for geometric dimension of silicon wafers for solar cell                       |

| Measurement Standards Used in This Test     |                |                                            |                                                                                                                                              |                                                           |            |
|---------------------------------------------|----------------|--------------------------------------------|----------------------------------------------------------------------------------------------------------------------------------------------|-----------------------------------------------------------|------------|
| Name                                        | Number         | Measuring Range                            | Uncertainty or Accuracy Class or Maximum Permissible Error                                                                                   | Name of Traceability Institution/Certificate No.          | Due Date   |
| Source Meter                                | 10807C0087 8-2 | Current:10μA~1A;<br>Voltage:20mV~20V       | Measure:<br>DCV: $U_{rel}=0.05\%,k=2$ ;<br>DCI: $U_{rel}=0.05\%,k=2$<br>Output:<br>DCV: $U_{rel}=0.05\%,k=2$ ; DCI:<br>$U_{rel}=0.05\%,k=2$  | Fujian Metrology Institute/<br>24D2-01917                 | 2025-04-17 |
| Solar Simulator                             | 2014-017       | (300~1200) nm; (800~1200) W/m <sup>2</sup> | Spectral Match: (300~360) nm: $U_{rel}=8.0\%$ ( $k=2$ );(360~1200) nm: $U_{rel}=6.2\%$ ( $k=2$ );Irradiance Ratio: $U_{rel}=1.2\%$ ( $k=2$ ) | Fujian Metrology Institute/<br>24Q2-00981                 | 2025-06-16 |
| WPVS Monocrystalline Silicon Reference Cell | 015-2014       | (300~1200) nm                              | $U_{rel}=1.3\%$ ( $k=2$ )                                                                                                                    | National Institute of Metrology, China/<br>GXgf2023-01245 | 2025-03-29 |
| Automatic Image Measuring Instrument        | 11656          | X-axis: (0~195) mm; Y-axis: (0~195) mm     | $U=2\text{ }\mu\text{m}$ ( $k=2$ )                                                                                                           | Fujian Metrology Institute/24A2-09430                     | 2025-07-23 |
| Digital Thermometer                         | 15-B           | (15~65)℃                                   | $U=0.1\text{ }^{\circ}\text{C}$ ( $k=2$ )                                                                                                    | Fujian Metrology Institute/24B2-05374                     | 2025-06-19 |

以下空白  
Blank below

Figure S21. The certified result of the 1.76 eV single-junction perovskite solar cell, measured at the National PV Industry Measurement and Testing Center. Anti-reflection coating was applied on the device. Under reverse scan, the device achieved a PCE of 20.35%, a  $J_{SC}$  of 18.64 mA cm<sup>-2</sup>, a  $V_{OC}$  of 1.305 V, and an FF of 83.65%. Under forward scan, the device achieved a PCE of 19.94%, a  $J_{SC}$  of 18.63 mA cm<sup>-2</sup>, a  $V_{OC}$  of 1.301 V, and an FF of 82.26%.



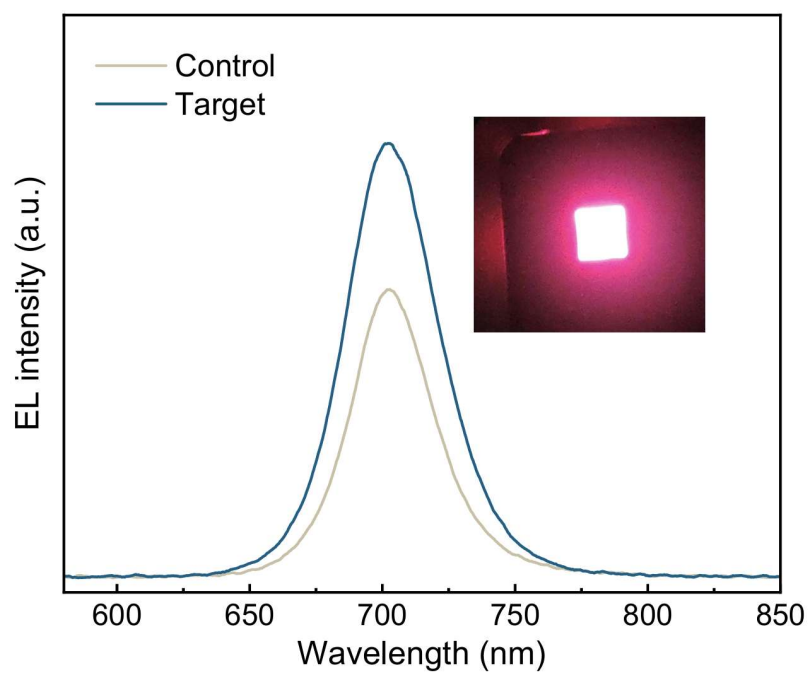

Figure S22. Electroluminescence spectra of the PSCs under 2 V bias.

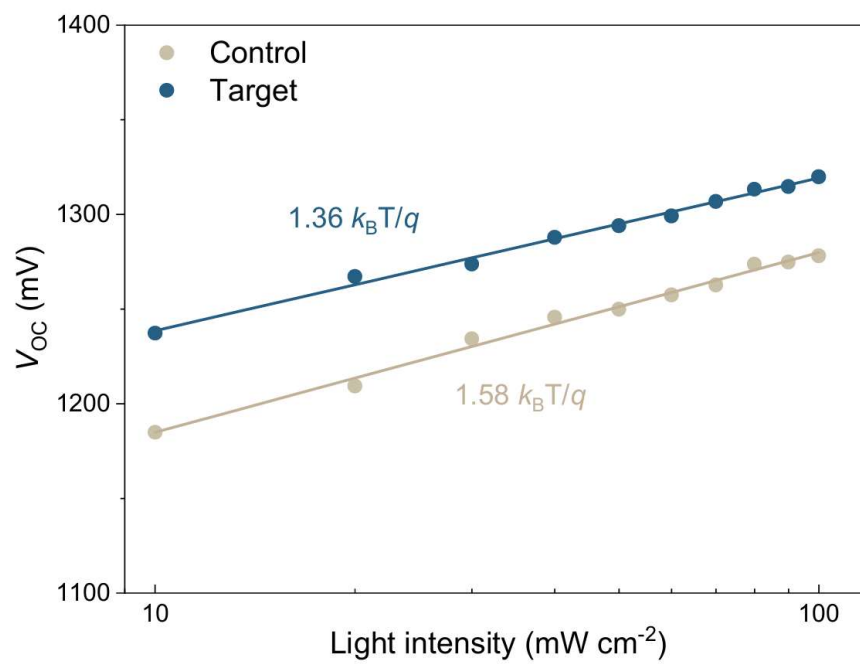

Figure S23. Light intensity dependence of the devices  $V_{OC}$ .

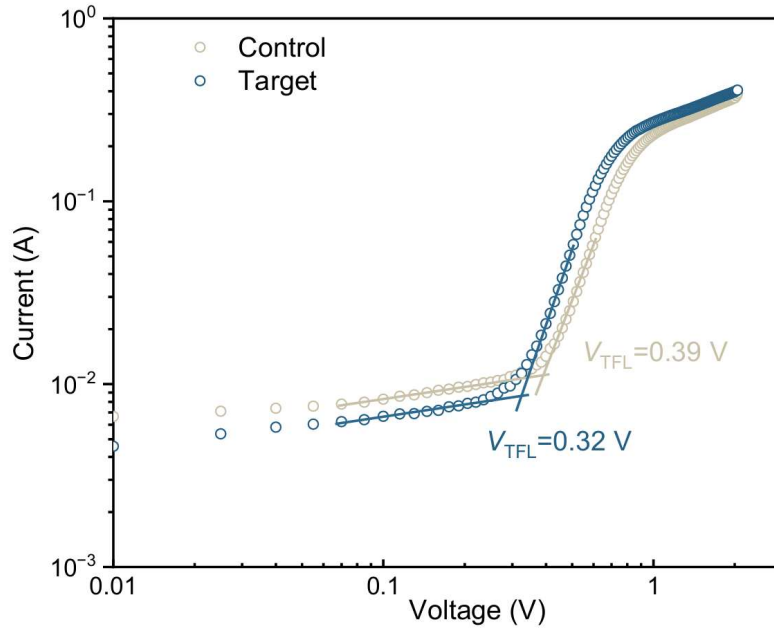

Figure S24. Logarithmic  $I$ - $V$  curves of the hole-only devices FTO/NiO/SAM/WBG/Spiro-OMeTAD/Cu. Through the equation  $N_d = \frac{2\varepsilon\varepsilon_0V_{TFL}}{eL^2}$ , where  $\varepsilon$  and  $\varepsilon_0$  are the dielectric constant and vacuum permittivity, respectively,  $e$  is the unit charge, and  $L$  is the thickness of the perovskite film, trap densities of the control and target devices were determined as  $7.76 \times 10^{15} \text{ cm}^{-3}$  and  $1.06 \times 10^{15} \text{ cm}^{-3}$ , respectively.

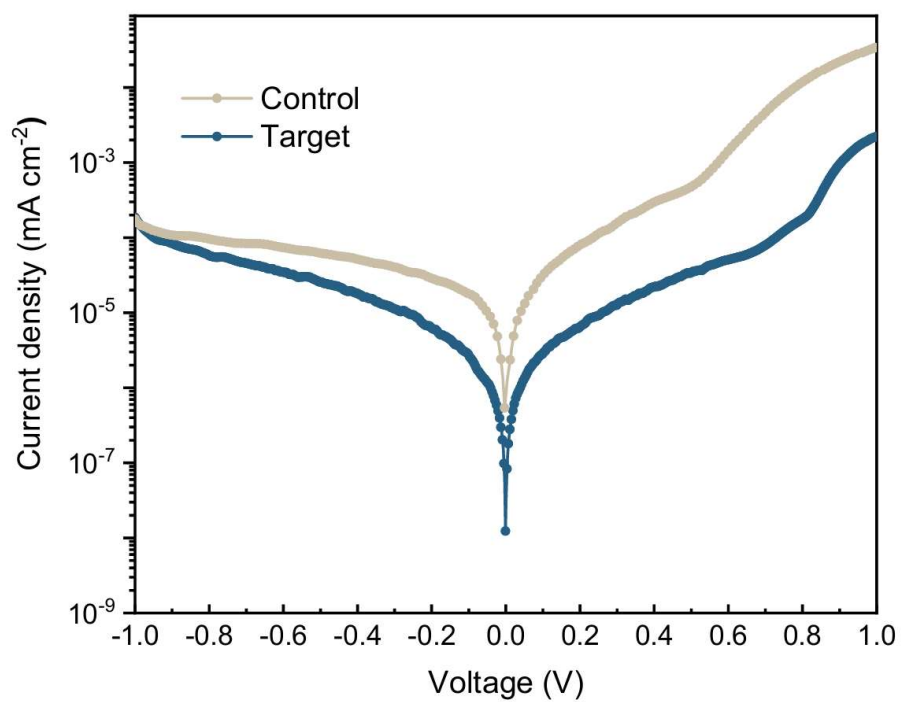

Figure S25. Dark  $J$ - $V$  curves of the WBG PSCs.

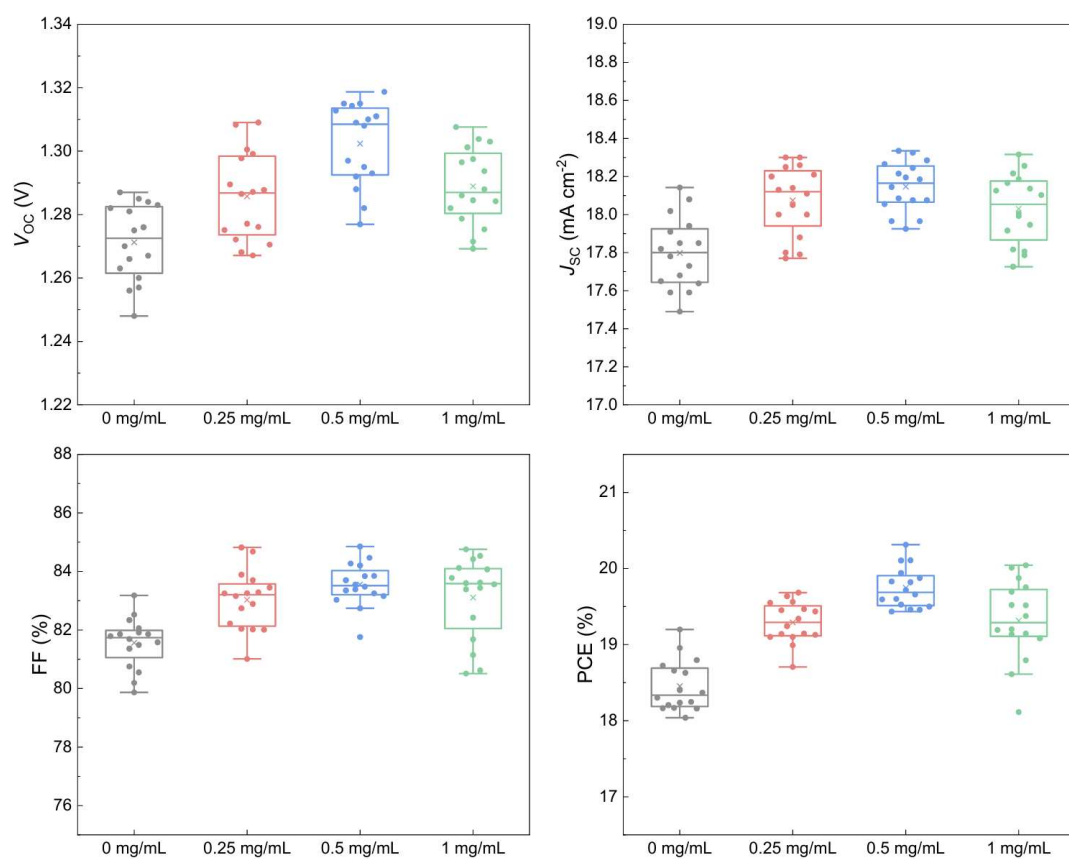

Figure S26. Photovoltaic parameters statistics of the 4PADCBC-based single-junction PSCs with different FPT concentrations, measured by reverse scan. Center line, median; cross mark, mean; box range, 25/75 percentiles; whiskers, the outermost outliers within  $1.5 \times$  interquartile range.

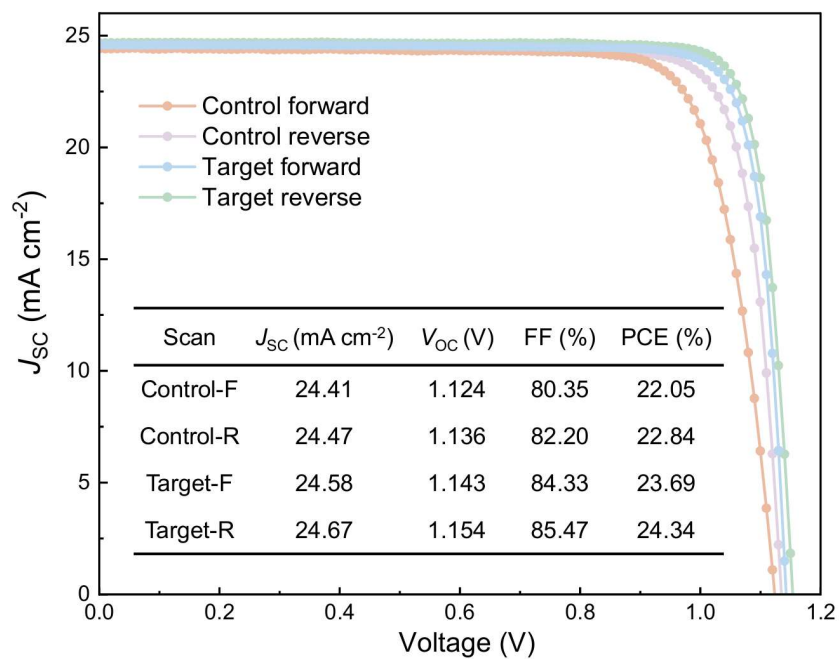

Figure S27.  $J$ - $V$  curves and photovoltaic parameters of 1.53 eV PSCs with the architecture FTO/4PADCB/Cs<sub>0.05</sub>(FA<sub>0.98</sub>MA<sub>0.02</sub>)<sub>0.95</sub>Pb(I<sub>0.98</sub>Br<sub>0.02</sub>)<sub>3</sub>/EDAI<sub>2</sub>/C<sub>60</sub>/BCP/Cu.

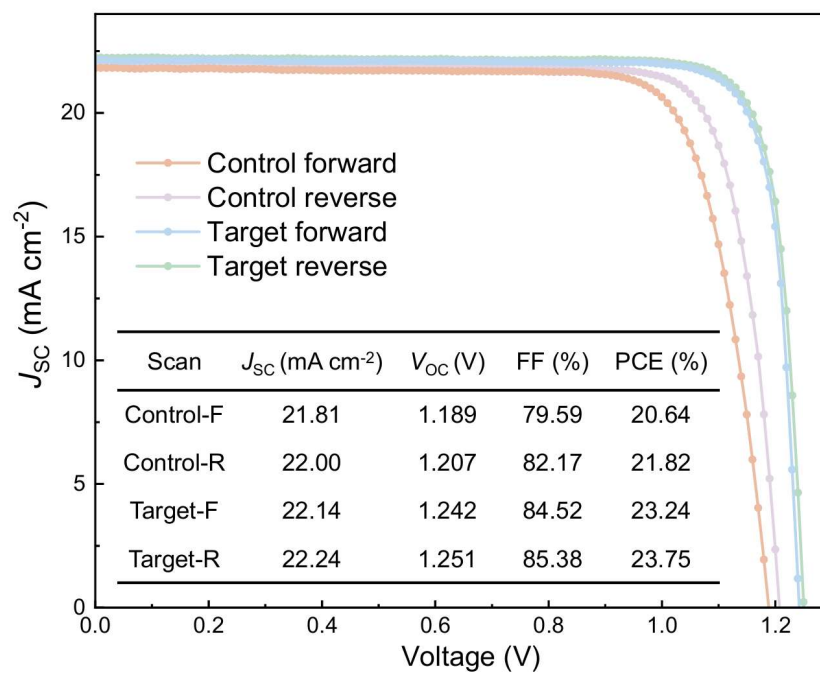

Figure S28.  $J$ - $V$  curves and photovoltaic parameters of 1.68 eV PSCs with the architecture FTO/Me-4PACz:MeO-2PACz=2:1/Cs<sub>0.05</sub>MA<sub>0.15</sub>FA<sub>0.8</sub>Pb(I<sub>0.75</sub>Br<sub>0.25</sub>)<sub>3</sub>/EDAI<sub>2</sub>/C<sub>60</sub>/BCP/Cu.

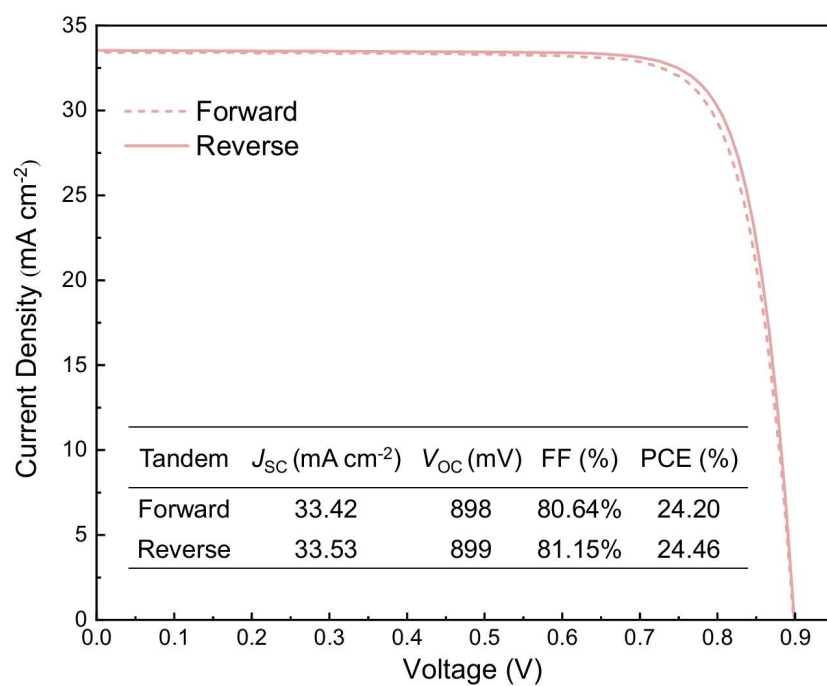

Figure S29.  $J$ - $V$  curves and photovoltaic parameters of the 1.25 eV NBG device with the architecture FTO/PEDOT: PSS/Rb<sub>0.04</sub>Cs<sub>0.2</sub>FA<sub>0.76</sub>Pb<sub>0.5</sub>Sn<sub>0.5</sub>I<sub>3</sub>/EDAI<sub>2</sub>/C<sub>60</sub>/BCP/Cu.



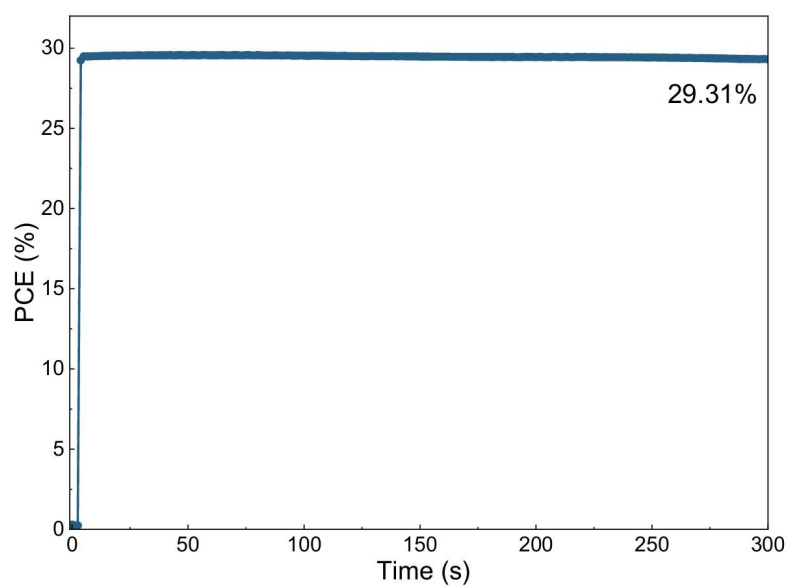

Figure S30. Steady-state power output of the tandem cell during 300 s operation.

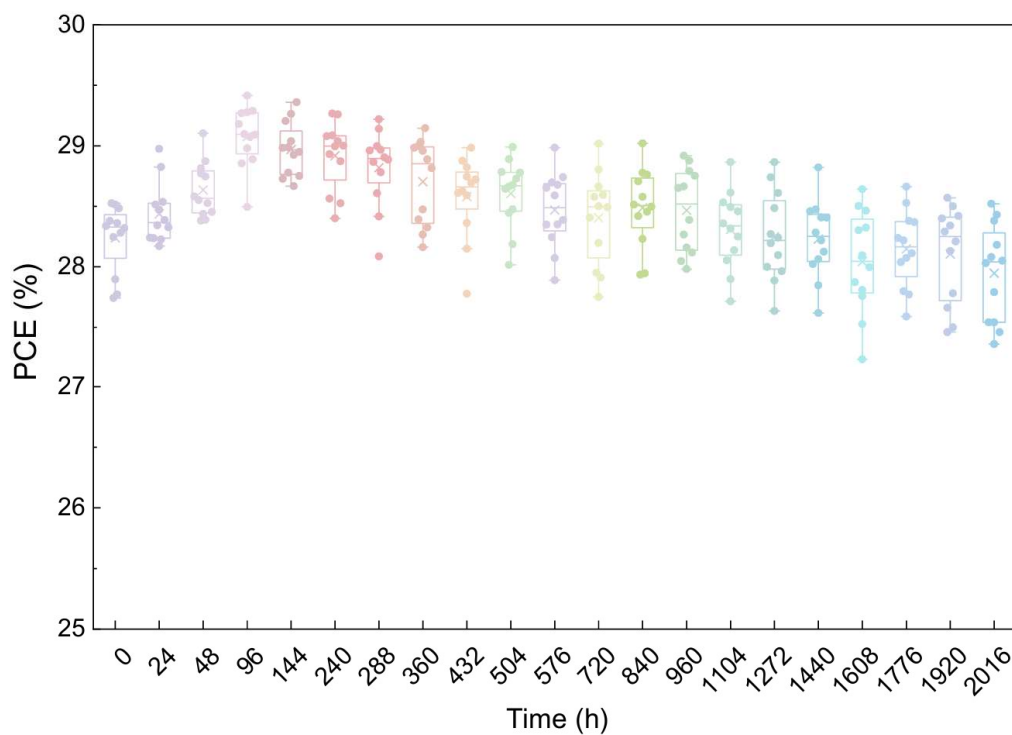

Figure S31. The shelf stability of 12 unencapsulated tandem cells during 2016 hours storage (dark; N<sub>2</sub>). Center line, median; cross mark, mean; box range, 25/75 percentiles; whiskers, the outermost outliers within  $1.5 \times$  interquartile range. The mean PCEs at 96 h and 2016 h are 29.07% and 27.95%, respectively.

Table S1. Fitting results for the time-resolved PL decay curves. Formula of the double-exponential decay function is  $y = A_1 \cdot \exp(-x/\tau_1) + A_2 \cdot \exp(-x/\tau_2) + y_0$ .

| Sample  | $A_1$ | $\tau_1$ (ns) | $A_2$ | $\tau_2$ (ns) |
|---------|-------|---------------|-------|---------------|
| Control | 0.71  | 128           | 0.16  | 576           |
| Target  | 0.76  | 228           | 0.14  | 750           |

Table S2. Overlap integrals between the molecular orbitals and perovskite VBM orbital.

| Molecular orbital ( $\psi_m$ ) | Overlap integral $\int \psi_m^* \psi_{VBM} dV$ |
|--------------------------------|------------------------------------------------|
| Me-4PACz HOMO                  | 0.00038                                        |
| Me-4PACz HOMO-1                | 0.00040                                        |
| Me-4PACz/FPT HOMO              | 0.00112                                        |
| Me-4PACz/FPT HOMO-1            | 0.00608                                        |

Table S3. Fitting results for the transient absorption decay curves. Formula of the double-exponential decay function is  $y = A_1 \cdot \exp(-x/\tau_1) + A_2 \cdot \exp(-x/\tau_2) + y_0$ .

| Sample  | $A_1$ | $\tau_1$ (ps) | $A_2$ | $\tau_2$ (ps) |
|---------|-------|---------------|-------|---------------|
| Control | 0.32  | 395           | 0.45  | 2903          |
| Target  | 0.33  | 171           | 0.48  | 2690          |

Table S4. Average photovoltaic parameters with standard deviations of the single-junction PSCs with different FPT concentrations, measured in reverse scan.

| Device     | $J_{sc}$ (mA cm <sup>-2</sup> ) | $V_{oc}$ (mV) | FF (%)     | PCE (%)    |
|------------|---------------------------------|---------------|------------|------------|
| Control    | 17.89±0.20                      | 1279±8.84     | 79.54±1.98 | 18.20±0.53 |
| 0.25 mg/mL | 18.18±0.10                      | 1301±7.95     | 82.90±1.06 | 19.61±0.37 |
| 0.5 mg/mL  | 18.23±0.19                      | 1305±11.25    | 84.57±0.77 | 20.12±0.32 |
| 1 mg/mL    | 18.07±0.13                      | 1301±11.08    | 82.68±1.01 | 19.44±0.37 |

Table S5. Certified photovoltaic performance in reverse scan of state-of-the-art WBG PSCs (1.75-1.80 eV).

| Year      | Composition                                                                                                    | $E_g$ (eV) | PCE (%) | Ref |
|-----------|----------------------------------------------------------------------------------------------------------------|------------|---------|-----|
| 2023      | Cs <sub>0.2</sub> FA <sub>0.8</sub> Pb(I <sub>0.65</sub> Br <sub>0.35</sub> ) <sub>3</sub>                     | 1.75       | 18.81   | 12  |
| 2024      | Cs <sub>0.2</sub> FA <sub>0.8</sub> Pb(I <sub>0.6</sub> Br <sub>0.4</sub> ) <sub>3</sub>                       | 1.77       | 19.31   | 13  |
| 2024      | Cs <sub>0.2</sub> FA <sub>0.8</sub> Pb(I <sub>0.6</sub> Br <sub>0.4</sub> ) <sub>3</sub>                       | 1.77       | 18.88   | 14  |
| 2024      | Cs <sub>0.15</sub> MA <sub>0.05</sub> FA <sub>0.8</sub> Pb(I <sub>0.7</sub> Br <sub>0.3</sub> ) <sub>3</sub>   | 1.75       | 20.70   | 15  |
| 2025      | Cs <sub>0.2</sub> FA <sub>0.8</sub> Pb(I <sub>0.6</sub> Br <sub>0.4</sub> ) <sub>3</sub>                       | 1.77       | 19.72   | 16  |
| 2025      | Cs <sub>0.2</sub> FA <sub>0.8</sub> Pb(I <sub>0.6</sub> Br <sub>0.4</sub> ) <sub>3</sub>                       | 1.77       | 19.72   | 17  |
| 2025      | Cs <sub>0.2</sub> FA <sub>0.8</sub> Pb(I <sub>0.6</sub> Br <sub>0.4</sub> ) <sub>3</sub>                       | 1.77       | 17.17   | 18  |
| 2025      | Cs <sub>0.2</sub> FA <sub>0.8</sub> Pb(I <sub>0.6</sub> Br <sub>0.4</sub> ) <sub>3</sub>                       | 1.77       | 20.21   | 19  |
| 2025      | Cs <sub>0.15</sub> DMA <sub>0.07</sub> FA <sub>0.78</sub> Pb(I <sub>0.7</sub> Br <sub>0.3</sub> ) <sub>3</sub> | 1.76       | 21.18   | 20  |
| This work | Cs <sub>0.2</sub> FA <sub>0.8</sub> Pb(I <sub>0.63</sub> Br <sub>0.37</sub> ) <sub>3</sub>                     | 1.76       | 20.35   |     |

Table S6. Average photovoltaic parameters with standard deviations of the all-perovskite tandem solar cells, measured in reverse scan.

| Device  | $J_{sc}$ (mA cm <sup>-2</sup> ) | $V_{oc}$ (mV) | FF (%)     | PCE (%)    |
|---------|---------------------------------|---------------|------------|------------|
| Control | 15.93±0.18                      | 2068±15.86    | 82.09±0.97 | 27.04±0.40 |
| Target  | 16.24±0.22                      | 2109±16.63    | 83.48±1.08 | 28.60±0.52 |

## Reference

1. F. Neese, F. Wennmohs, U. Becker and C. Riplinger, *J. Chem. Phys.*, 2020, **152**, 224108.
2. Y. Zhao and D. G. Truhlar, *Theoretical Chemistry Accounts*, 2008, **120**, 215-241.
3. F. Weigend and R. Ahlrichs, *Physical Chemistry Chemical Physics*, 2005, **7**, 3297.
4. F. Weigend, *Physical Chemistry Chemical Physics*, 2006, **8**, 1057.
5. S. Grimme, J. Antony, S. Ehrlich and H. Krieg, *The Journal of Chemical Physics*, 2010, **132**, 154104.
6. J. PERDEW and Y. WANG, *PHYSICAL REVIEW B*, 1992, **45**, 13244-13249.
7. A. D. Becke, *J. Chem. Phys.*, 1993, **98**, 5648-5652.
8. T. D. Kühne, M. Iannuzzi, M. Del Ben, V. V. Rybkin, P. Seewald, F. Stein, T. Laino, R. Z. Khaliullin, O. Schütt, F. Schiffmann, D. Golze, J. Wilhelm, S. Chulkov, M. H. Bani-Hashemian, V. Weber, U. Borštnik, M. Taillefumier, A. S. Jakobovits, A. Lazzaro, H. Pabst, T. Müller, R. Schade, M. Guidon, S. Andermatt, N. Holmberg, G. K. Schenter, A. Hehn, A. Bussy, F. Belleflamme, G. Tabacchi, A. Glöß, M. Lass, I. Bethune, C. J. Mundy, C. Plessl, M. Watkins, J. VandeVondele, M. Krack and J. Hutter, *The Journal of Chemical Physics*, 2020, **152**, 194103.
9. J. P. Perdew, K. Burke and M. Ernzerhof, *Phys. Rev. Lett. (USA)*, 1996, **77**, 3865-3868.
10. T. Lu and F. Chen, *Journal of Computational Chemistry*, 2012, **33**, 580-592.
11. W. Humphrey, A. Dalke and K. Schulten, *J. Mol. Graph.*, 1996, **14**, 33-38.
12. S. Li, Z. Zheng, J. Ju, S. Cheng, F. Chen, Z. Xue, L. Ma and Z. Wang, *Adv. Mater.*, 2024, **36**.
13. X. Jiang, Q. Zhou, Y. Lu, H. Liang, W. Li, Q. Wei, M. Pan, X. Wen, X. Wang, W. Zhou, D. Yu, H. Wang, N. Yin, H. Chen, H. Li, T. Pan, M. Ma, G. Liu, W. Zhou, Z. Su, Q. Chen, F. Fan, F. Zheng, X. Gao, Q. Ji and Z. Ning, *National Science Review*, 2024, **11**.
14. Z. Yi, W. Wang, R. He, J. Zhu, W. Jiao, Y. Luo, Y. Xu, Y. Wang, Z. Zeng, K. Wei, J. Zhang, S.-W. Tsang, C. Chen, W. Tang and D. Zhao, *Energy Environ. Sci.*, 2024, **17**, 202-209.
15. R. Wang, X. Liu, S. Yan, N. Meng, X. Zhao, Y. Chen, H. Li, S. M. H. Qaid, S. Yang, M. Yuan and T. He, *Nature Communications*, 2024, **15**.
16. D. Pu, X. Zhang, H. Fang, W. Shen, G. Chen, W. Chen, P. Jia, G. Li, H. Guan, L. Huang, Y. Zhou, J. Wang, W. Zheng, W. Meng, G. Fang and W. Ke, *Science Advances*, 2025, **11**.
17. S. Fu, S. Zhou, W. Meng, G. Li, K. Dong, D. Pu, J. Zhou, C. Wang, H. Guan, W. Shao, L. Huang, Z. Su, C. Wang, G. Chen, P. Jia, J. Wang, Z. Xu, X. Gao, H. Cong, T. Wang, C. Xiao, G. Fang and W. Ke, *Nature Nanotechnology*, 2025, **20**, 764-771.
18. X. Zheng, S. Yang, J. Zhu, R. Liu, L. Li, M. Zeng, C. Lan, S. Li, J. Li, Y. Shi, C. Chen, R. Guo, Z. Zheng, J. Guo, X. Wu, T. Luan, Z. Wang, D. Zhao, Y. Rong and X. Li, *Energy Environ. Sci.*, 2025, **18**, 2995-3004.
19. C. Shi, J. Wang, X. Lei, Q. Zhou, W. Wang, Z. Yang, S. Liu, J. Zhang, H. Zhu, R. Chen, Y. Pan, Z. Tan, W. Liu, Z. Zhao, Z. Cai, X. Qin, Z. Zhao, J. Li, Z. Liu and W. Chen, *Nature Communications*, 2025, **16**.
20. Y. Li, X. Zhao, N. Meng, S. Dong, S. Yan, M. Yang, C. Sun, Z. Li, S. Yang, M. Yuan and T. He, *Adv. Mater.*, 2025, DOI: 10.1002/adma.202505694.
